# Supplementary material for: Proteomic Profiling Reveals the Molecular Control of Oocyte Maturation
Source: PubMed Central journal article supplement (PMC9823227; doi:10.1016/j.mcpro.2022.100481), 2022-12-07

Fig S1

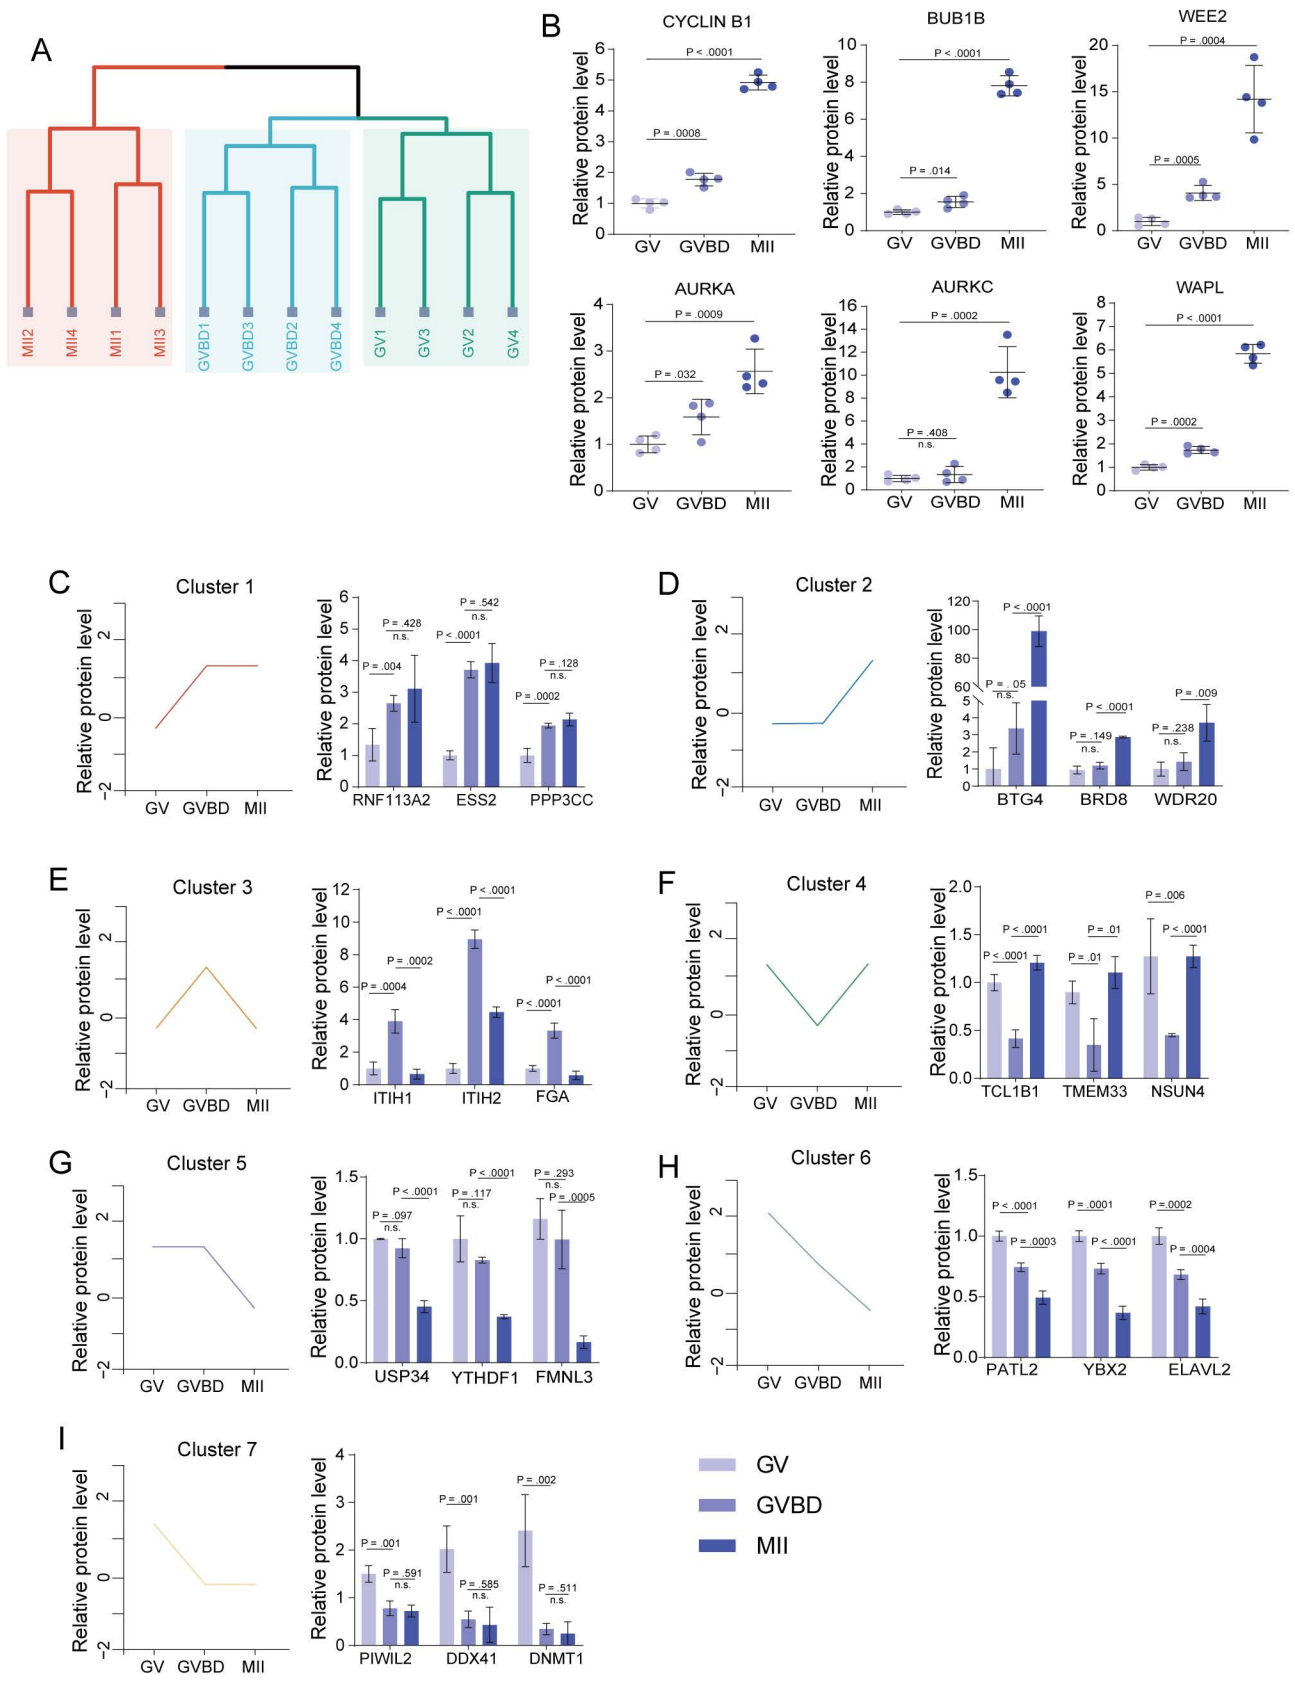

Fig S2

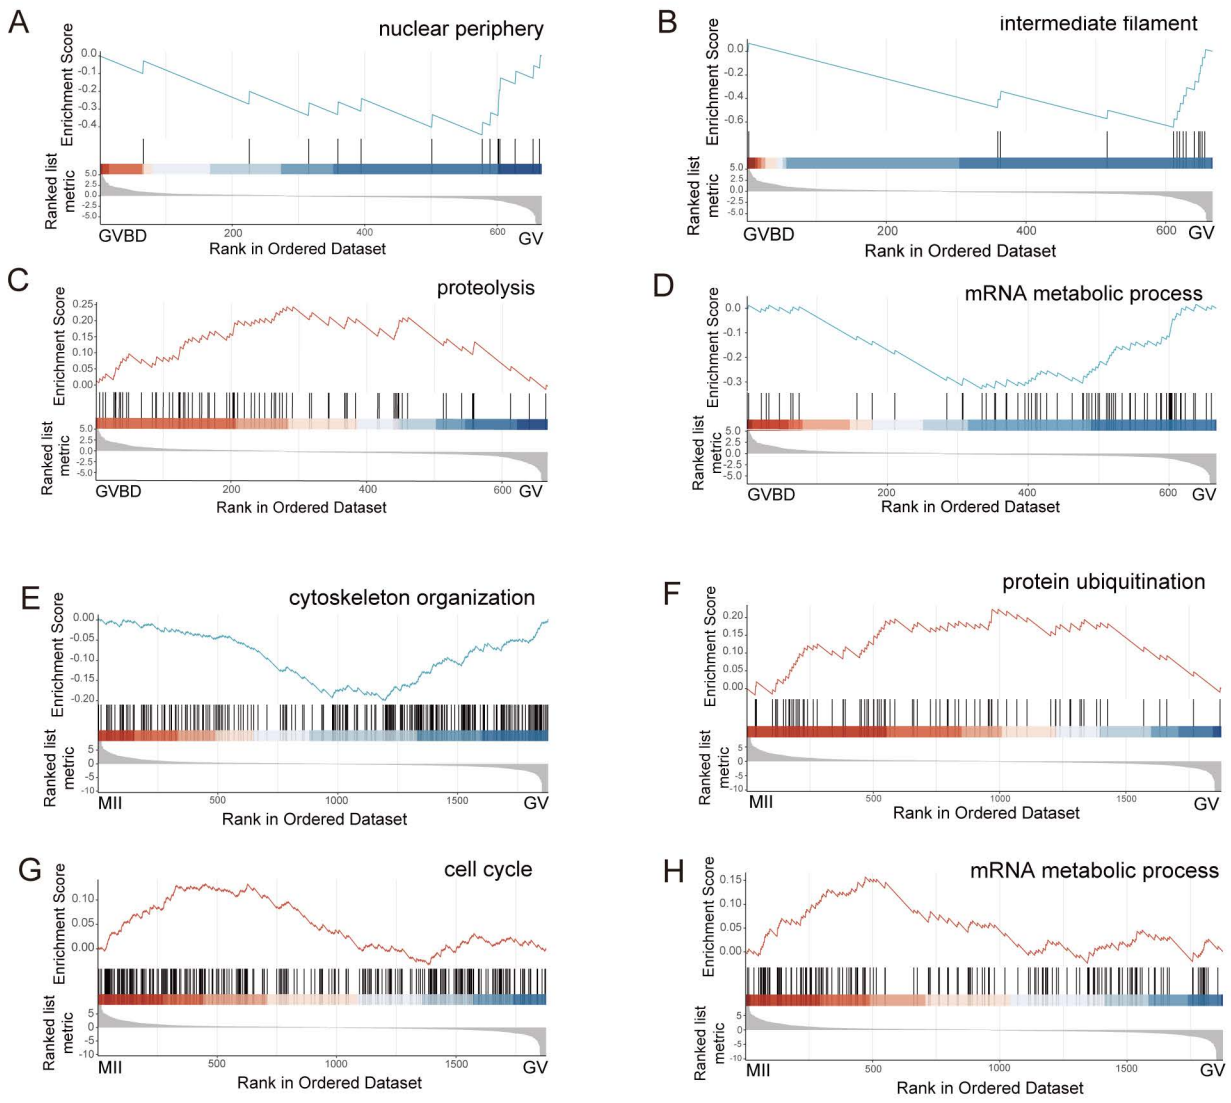

Fig S3

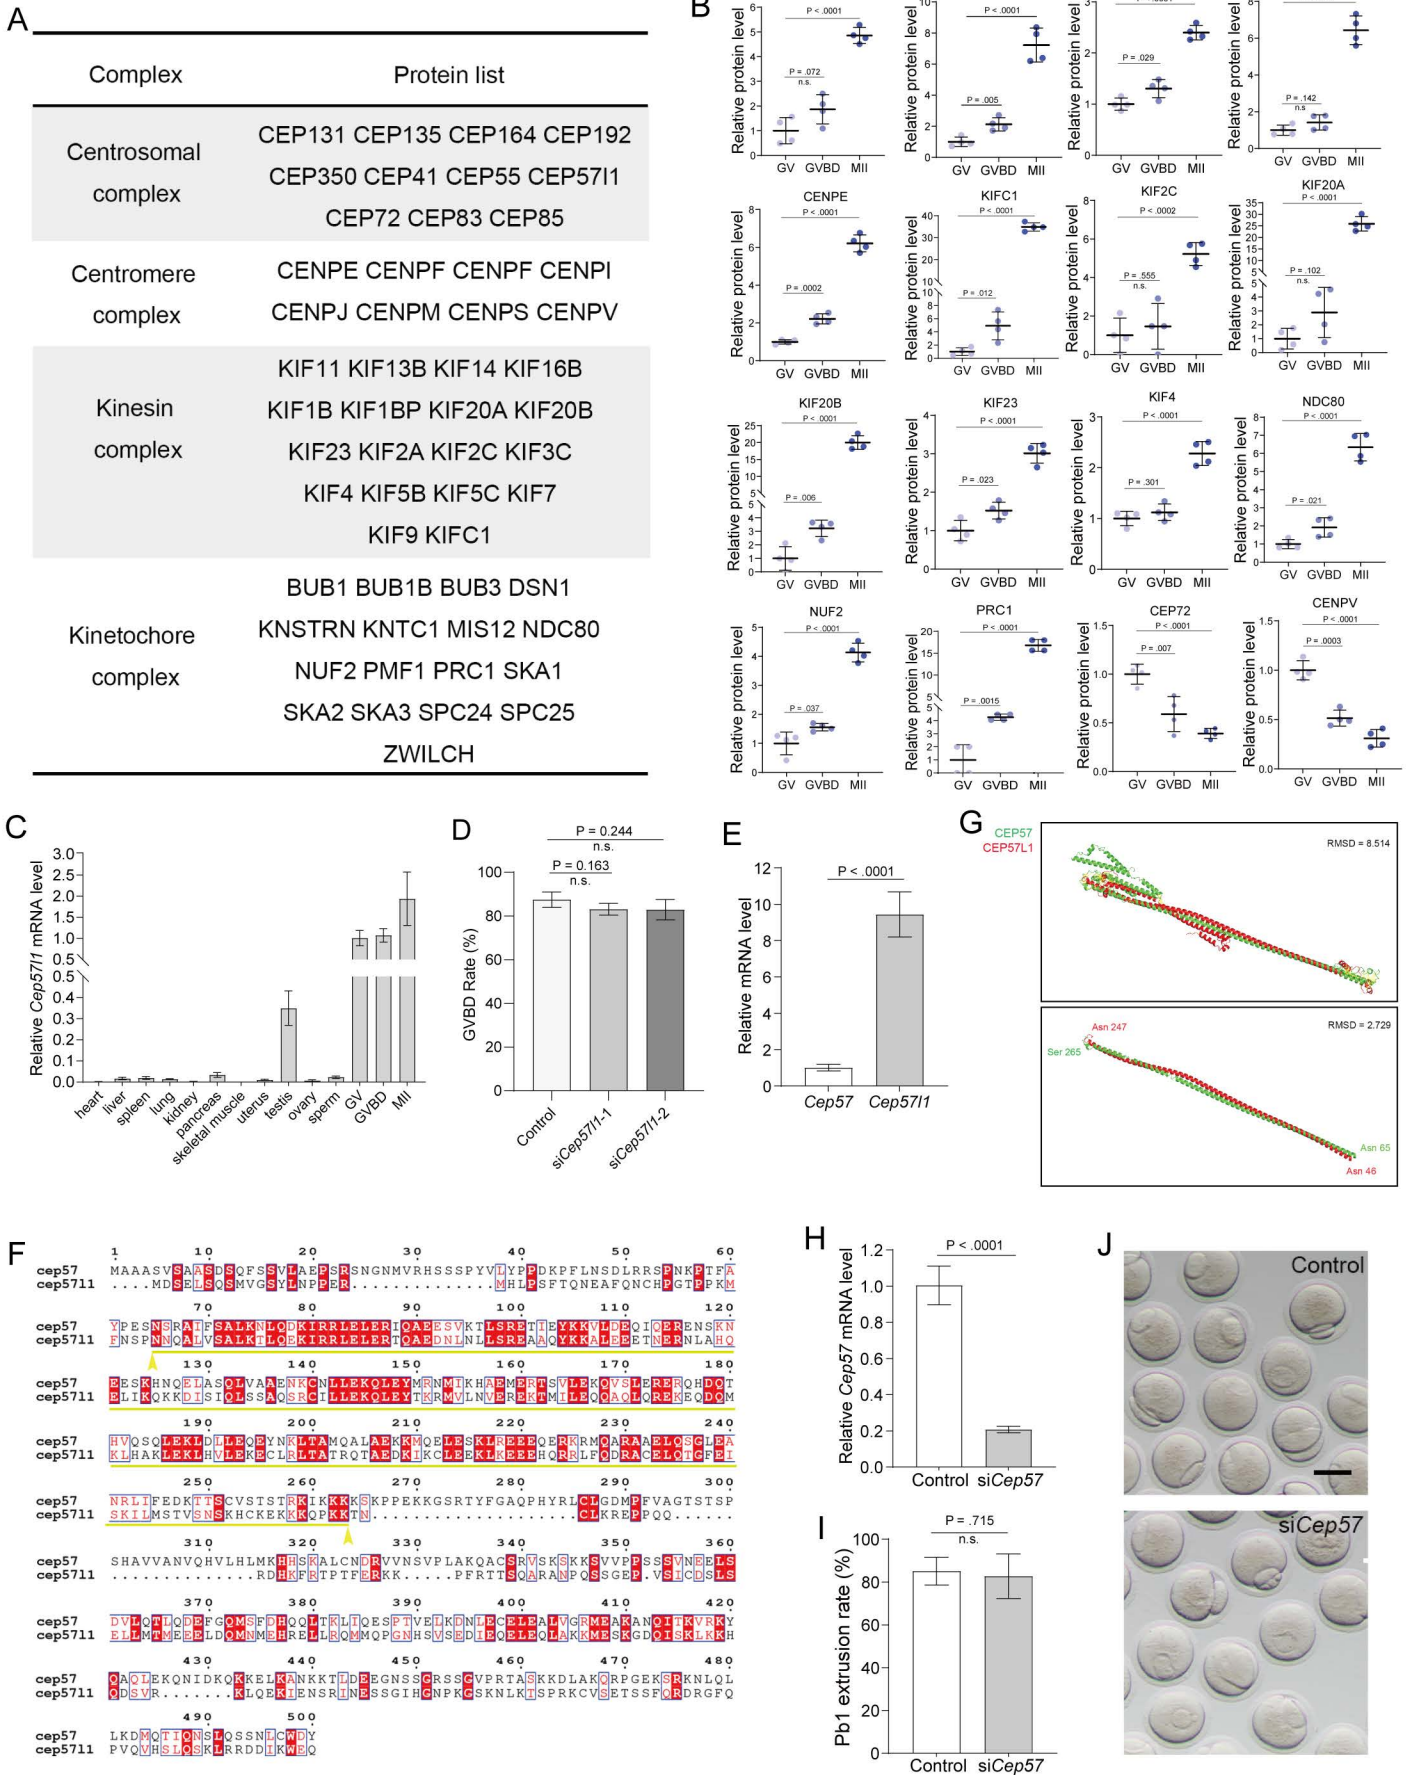

Fig S4

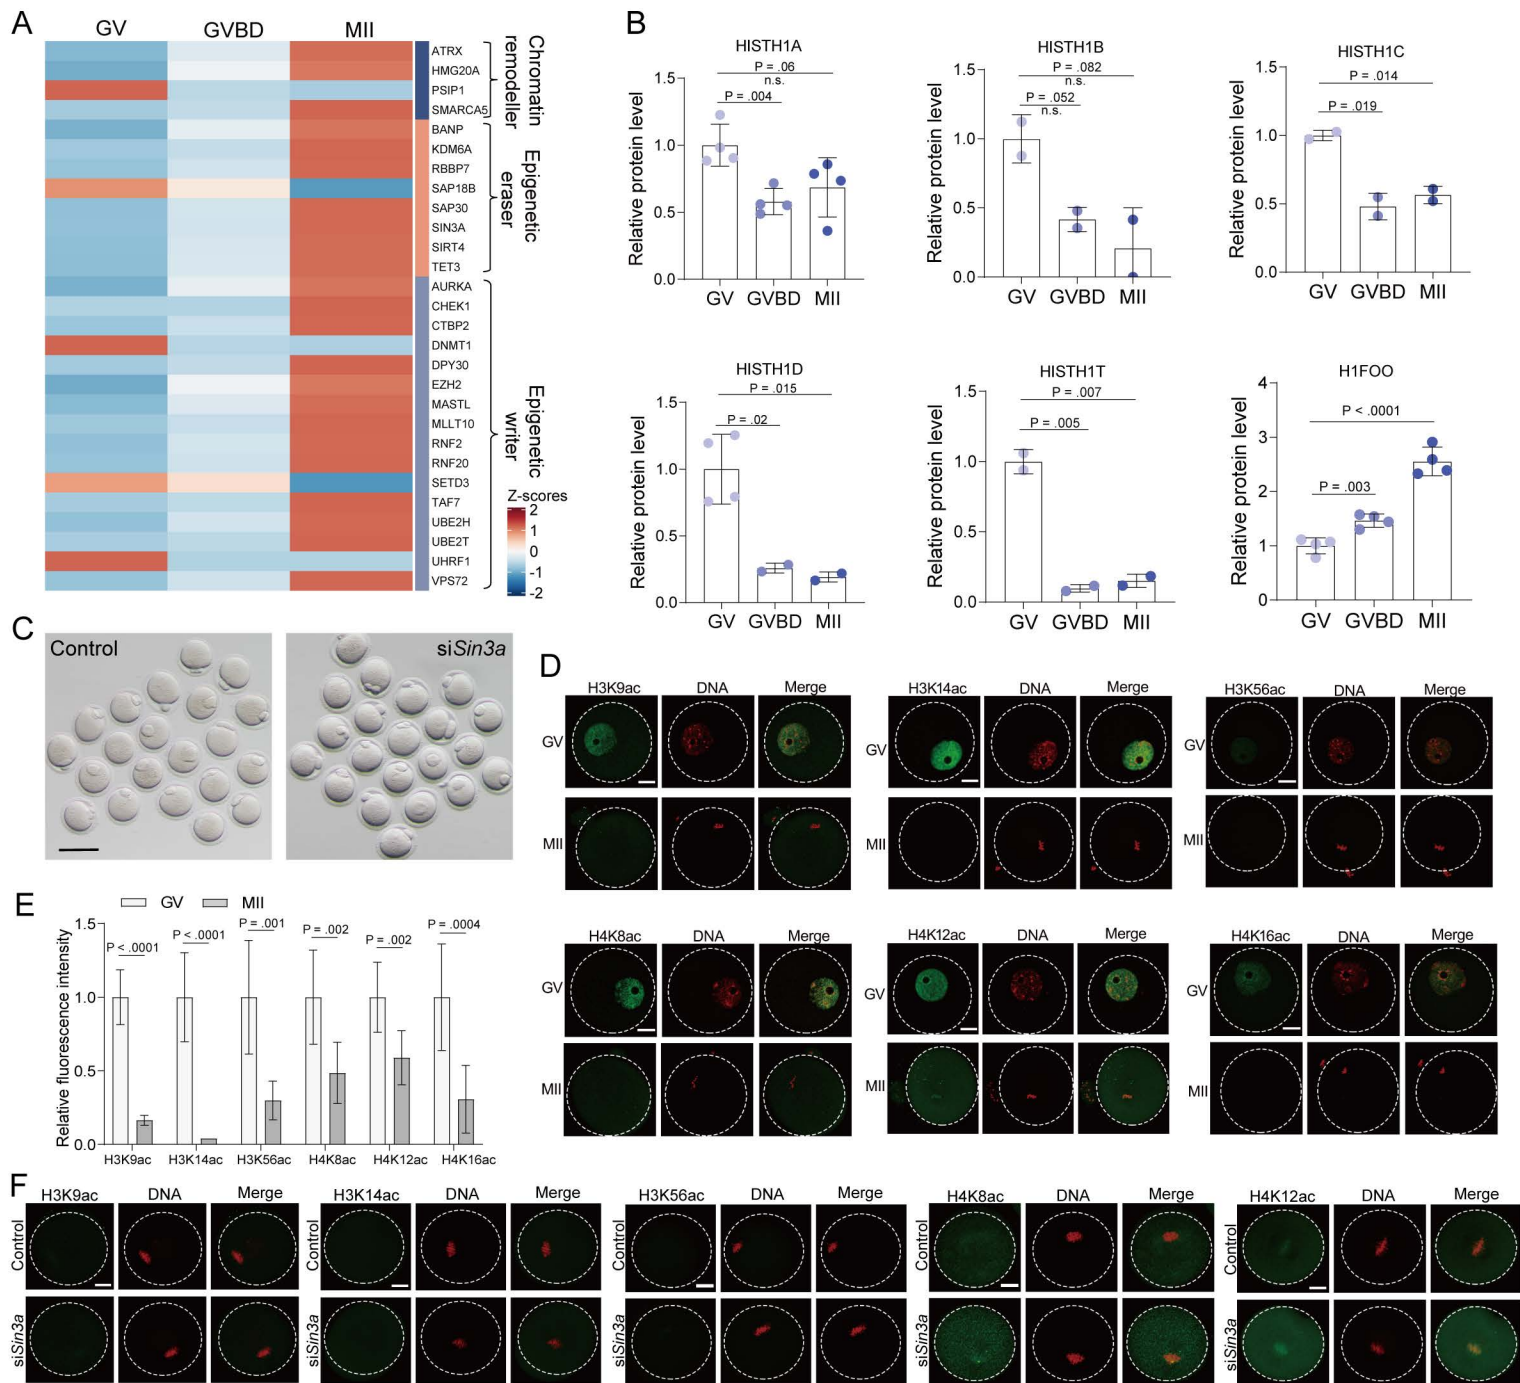

Fig S5

A

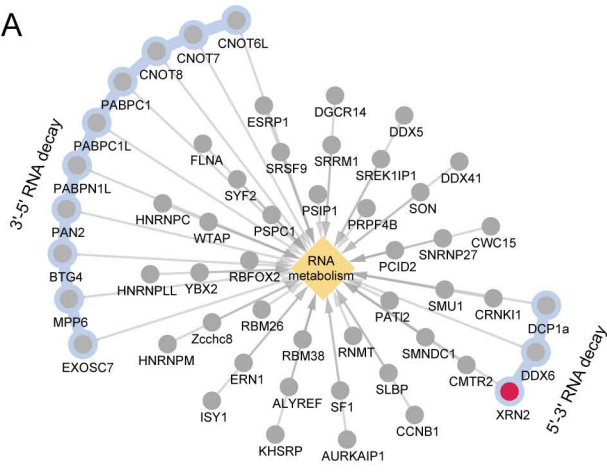

B

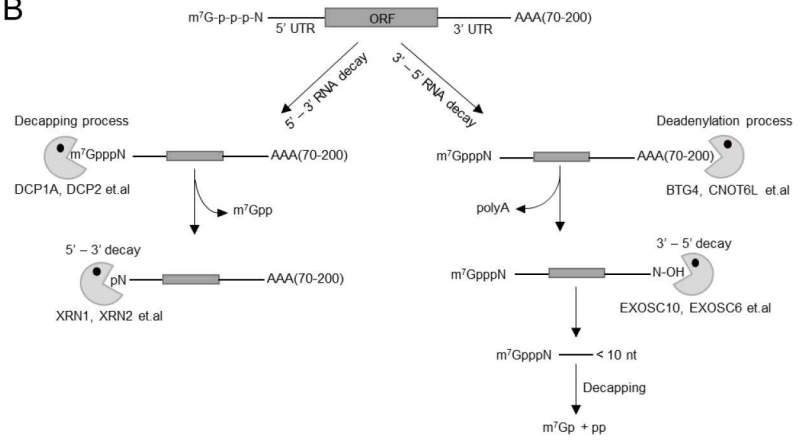

C

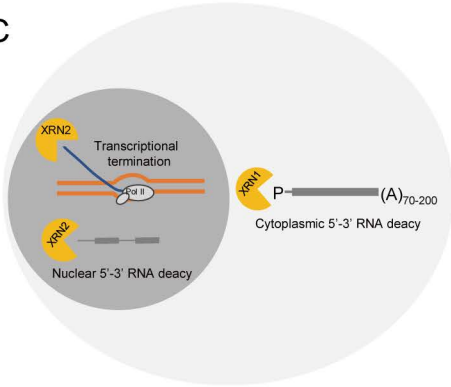

D

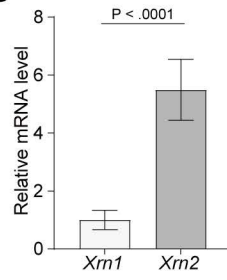

E

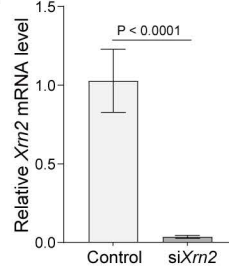

F

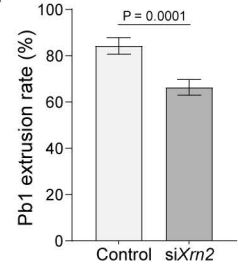

Fig S6

A

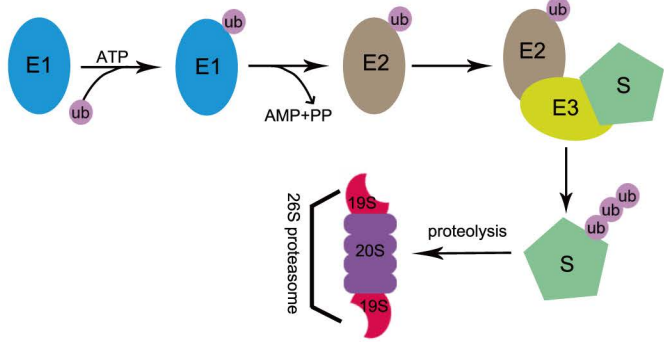

B

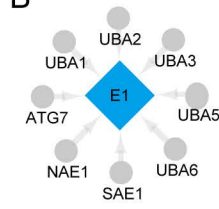

C

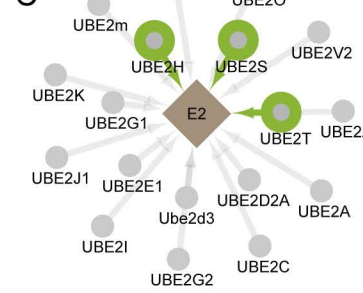

D

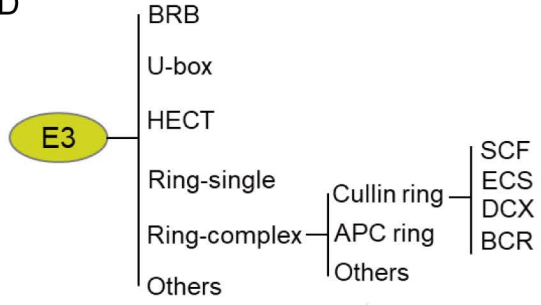

E

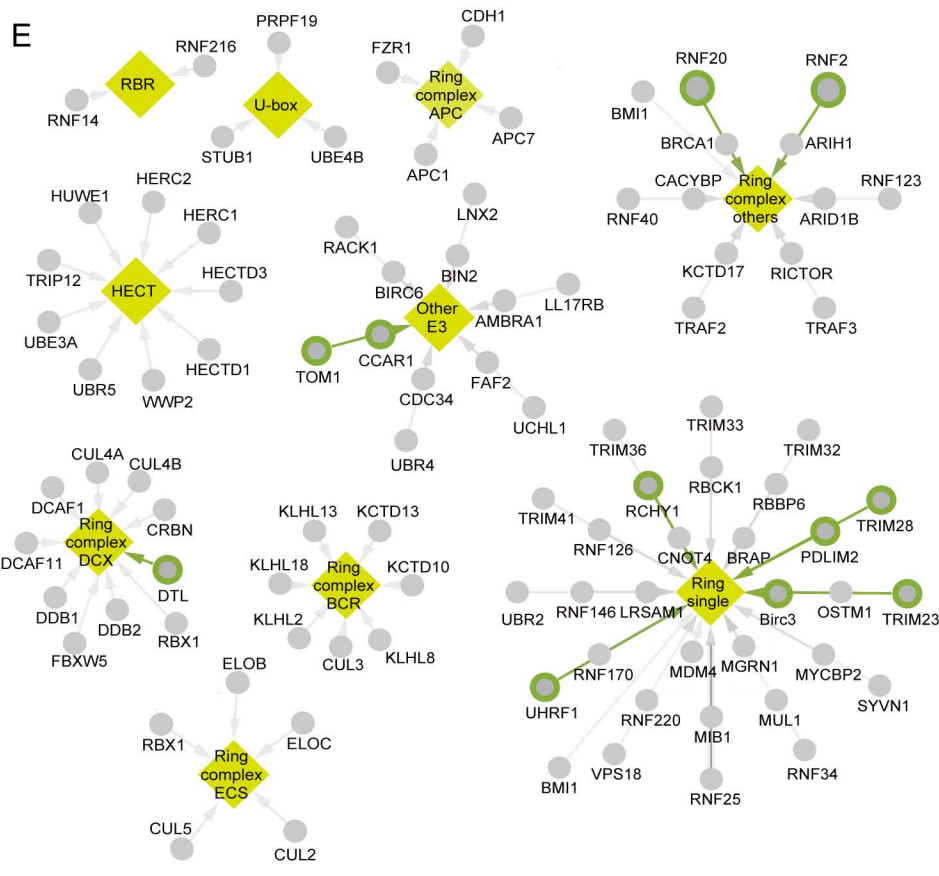

Fig S7

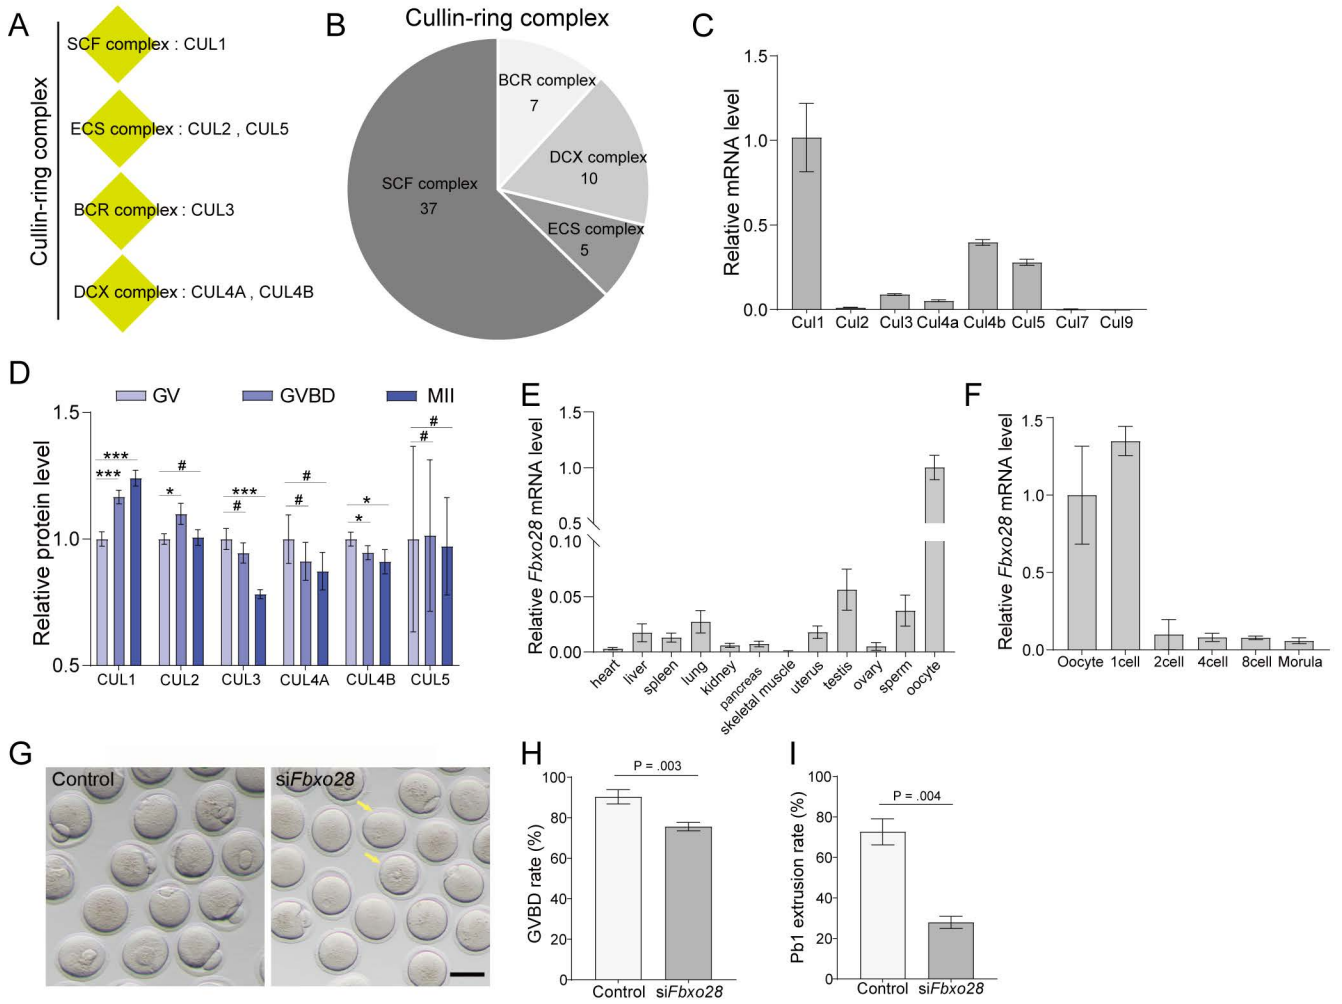

Fig S8

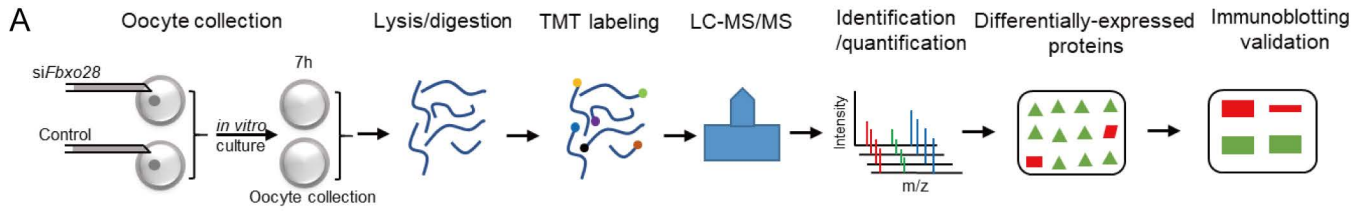

**B** Top 10 upregulated proteins in *siFbxo28* group (Set I)      Top 10 upregulated proteins in MLN4924 treated group (Set II)

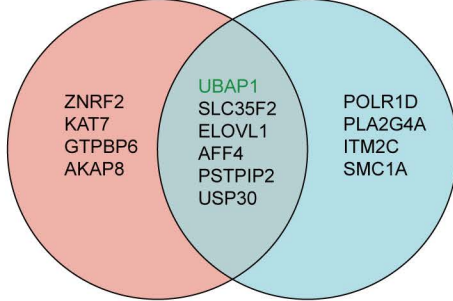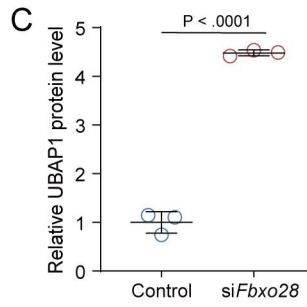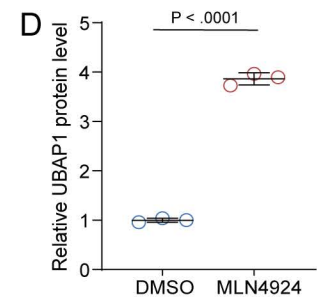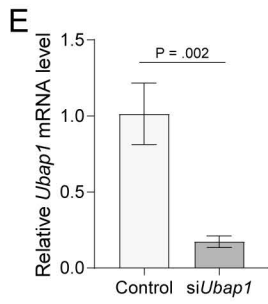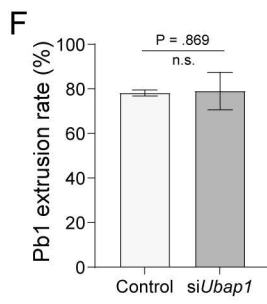

Supplement: mmc2.pdf [file mmc2.pdf]
